# Supplementary material
Source: PubMed Central journal article supplement (PMC2716022)
Supplement: blood-2009-01-198580_3.pdf [file blood-2009-01-198580_3.pdf]

| Chromosomal Region | Chromosomal Changes | Number of Cases | Number of Probesets in Chromosomal Band | Significant Expression Changes | % Expected Changes | Z-Score | Bands with excess of significant association |
|--------------------|---------------------|-----------------|-----------------------------------------|--------------------------------|--------------------|---------|----------------------------------------------|
| 10p13              | gain                | 5               | 70                                      | 3                              | 4.3                | 6.1     | -1.3                                         |
| 10p14              | gain                | 5               | 56                                      | 3                              | 5.4                | 4.9     | -0.9                                         |
| 10p15              | gain                | 5               | 94                                      | 8                              | 8.5                | 8.2     | -0.1                                         |
| 10q22              | loss                | 12              | 218                                     | 1                              | 0.5                | 19.1    | -4.1                                         |
| 10q23              | loss                | 17              | 183                                     | 30                             | 16.4               | 16.0    | 3.5                                          |
| 10q24              | loss                | 8               | 245                                     | 20                             | 8.2                | 21.5    | -0.3                                         |
| 11p11              | gain                | 6               | 132                                     | 7                              | 5.3                | 11.6    | -1.3                                         |
| 11p12              | gain                | 6               | 20                                      | 1                              | 5                  | 1.8     | -0.6                                         |
| 11p13              | gain                | 6               | 122                                     | 11                             | 9                  | 10.7    | 0.1                                          |
| 11p14              | gain                | 6               | 45                                      | 2                              | 4.4                | 3.9     | -1.0                                         |
| 11p15              | gain                | 6               | 483                                     | 30                             | 6.2                | 42.3    | -1.9                                         |
| 11q22              | loss                | 5               | 104                                     | 1                              | 1                  | 9.1     | -2.7                                         |
| 11q23              | gain                | 5               | 273                                     | 11                             | 4                  | 23.9    | -2.6                                         |
| 11q24              | gain                | 5               | 171                                     | 3                              | 1.8                | 15.0    | -3.1                                         |
| 11q25              | gain                | 5               | 26                                      | 0                              | 0                  | 2.3     | -1.5                                         |
| 12p11              | gain                | 11              | 98                                      | 10                             | 10.2               | 8.6     | 0.5                                          |
| 12p12              | gain                | 11              | 144                                     | 5                              | 3.5                | 12.6    | -2.1                                         |
| 12p13              | gain                | 9               | 377                                     | 9                              | 2.4                | 33.1    | -4.2                                         |
| 12q12              | gain                | 17              | 67                                      | 8                              | 11.9               | 5.9     | 0.9                                          |
| 12q13              | gain                | 19              | 465                                     | 50                             | 10.8               | 40.8    | 1.4                                          |
| 12q14              | gain                | 18              | 100                                     | 27                             | 27                 | 8.8     | 6.2                                          |
| 12q15              | gain                | 16              | 71                                      | 18                             | 25.4               | 6.2     | 4.7                                          |
| 12q21              | gain                | 10              | 153                                     | 14                             | 9.2                | 13.4    | 0.2                                          |
| 12q22              | gain                | 6               | 59                                      | 1                              | 1.7                | 5.2     | -1.8                                         |
| 12q23              | gain                | 8               | 171                                     | 1                              | 0.6                | 15.0    | -3.6                                         |
| 12q24              | gain                | 9               | 501                                     | 29                             | 5.8                | 43.9    | -2.3                                         |
| 13q12              | loss                | 10              | 182                                     | 2                              | 1.1                | 16.0    | -3.5                                         |
| 13q13              | loss                | 11              | 94                                      | 0                              | 0                  | 8.2     | -2.9                                         |
| 13q14              | loss                | 14              | 244                                     | 17                             | 7                  | 21.4    | -0.9                                         |
| 13q21              | loss                | 18              | 32                                      | 0                              | 0                  | 2.8     | -1.7                                         |
| 13q22              | loss                | 17              | 52                                      | 1                              | 1.9                | 4.6     | -1.7                                         |
| 13q31              | loss                | 15              | 51                                      | 0                              | 0                  | 4.5     | -2.1                                         |
| 13q32              | loss                | 13              | 95                                      | 1                              | 1.1                | 8.3     | -2.5                                         |
| 13q33              | loss                | 13              | 45                                      | 0                              | 0                  | 3.9     | -2.0                                         |
| 13q34              | loss                | 13              | 109                                     | 4                              | 3.7                | 9.6     | -1.8                                         |
| 15q15              | loss                | 5               | 160                                     | 5                              | 3.1                | 14.0    | -2.4                                         |
| 15q21              | loss                | 5               | 240                                     | 8                              | 3.3                | 21.0    | -2.8                                         |
| 15q22              | loss                | 5               | 180                                     | 7                              | 3.9                | 15.8    | -2.2                                         |
| 15q23              | loss                | 5               | 91                                      | 1                              | 1.1                | 8.0     | -2.5                                         |
| 15q24              | loss                | 5               | 146                                     | 5                              | 3.4                | 12.8    | -2.2                                         |
| 15q25              | loss                | 6               | 177                                     | 8                              | 4.5                | 15.5    | -1.9                                         |
| 15q26              | loss                | 7               | 180                                     | 8                              | 4.4                | 15.8    | -2.0                                         |
| 16p11              | gain                | 6               | 215                                     | 4                              | 1.9                | 18.8    | -3.4                                         |
| 16p12              | gain                | 6               | 196                                     | 5                              | 2.6                | 17.2    | -2.9                                         |
| 16p13              | gain                | 7               | 479                                     | 10                             | 2.1                | 42.0    | -4.9                                         |
| 16q22              | gain                | 5               | 292                                     | 6                              | 2.1                | 25.6    | -3.9                                         |
| 16q23              | gain                | 7               | 103                                     | 9                              | 8.7                | 9.0     | 0.0                                          |
| 16q24              | gain                | 7               | 170                                     | 11                             | 6.5                | 14.9    | -1.0                                         |
| 17p11              | gain                | 6               | 154                                     | 1                              | 0.6                | 13.5    | -3.4                                         |
| 17p12              | gain                | 6               | 60                                      | 0                              | 0                  | 5.3     | -2.3                                         |
| 17p13              | loss                | 5               | 846                                     | 62                             | 7.3                | 74.2    | -1.4                                         |
| 17q11              | gain                | 12              | 189                                     | 11                             | 5.8                | 16.6    | -1.4                                         |
| 17q12              | gain                | 12              | 188                                     | 9                              | 4.8                | 16.5    | -1.8                                         |
| 17q21              | gain                | 13              | 563                                     | 50                             | 8.9                | 49.4    | 0.1                                          |
| 17q22              | gain                | 14              | 18                                      | 0                              | 0                  | 1.6     | -1.3                                         |
| 17q23              | gain                | 15              | 236                                     | 27                             | 11.4               | 20.7    | 1.4                                          |
| 17q24              | gain                | 15              | 114                                     | 5                              | 4.4                | 10.0    | -1.6                                         |
| 17q25              | gain                | 13              | 408                                     | 31                             | 7.6                | 35.8    | -0.8                                         |
| 18p11              | gain                | 39              | 194                                     | 48                             | 24.7               | 17.0    | 7.5                                          |
| 18q11              | gain                | 36              | 86                                      | 11                             | 12.8               | 7.5     | 1.3                                          |
| 18q12              | gain                | 36              | 149                                     | 35                             | 23.5               | 13.1    | 6.1                                          |
| 18q21              | gain                | 33              | 220                                     | 58                             | 26.4               | 19.3    | 8.8                                          |
| 18q22              | gain                | 18              | 62                                      | 10                             | 16.1               | 5.4     | 2.0                                          |
| 18q23              | gain                | 16              | 54                                      | 5                              | 9.3                | 4.7     | 0.1                                          |
| 1q21               | gain                | 15              | 291                                     | 26                             | 8.9                | 25.5    | 0.1                                          |
| 1q22               | gain                | 15              | 103                                     | 11                             | 10.7               | 9.0     | 0.7                                          |
| 1q23               | gain                | 15              | 314                                     | 57                             | 18.2               | 27.5    | 5.6                                          |
| 1q24               | gain                | 15              | 124                                     | 17                             | 13.7               | 10.9    | 1.9                                          |
| 1q25               | gain                | 16              | 211                                     | 32                             | 15.2               | 18.5    | 3.1                                          |
| 1q31               | gain                | 18              | 89                                      | 16                             | 18                 | 7.8     | 2.9                                          |
| 1q32               | gain                | 18              | 315                                     | 31                             | 9.8                | 27.6    | 0.6                                          |
| 1q41               | gain                | 19              | 94                                      | 21                             | 22.3               | 8.2     | 4.4                                          |
| 1q42               | gain                | 18              | 225                                     | 42                             | 18.7               | 19.7    | 5.0                                          |
| 1q43               | gain                | 17              | 69                                      | 9                              | 13                 | 6.0     | 1.2                                          |
| 1q44               | gain                | 17              | 98                                      | 12                             | 12.2               | 8.6     | 1.2                                          |
| 2p11               | gain                | 10              | 132                                     | 10                             | 7.6                | 11.6    | -0.5                                         |
| 2p12               | gain                | 10              | 28                                      | 0                              | 0                  | 2.5     | -1.6                                         |
| 2p13               | gain                | 11              | 179                                     | 16                             | 8.9                | 15.7    | 0.1                                          |
| 2p14               | gain                | 21              | 61                                      | 10                             | 16.4               | 5.3     | 2.0                                          |
| 2p15               | gain                | 21              | 49                                      | 11                             | 22.4               | 4.3     | 3.2                                          |
| 2p16               | gain                | 20              | 119                                     | 22                             | 18.5               | 10.4    | 3.6                                          |
| 2p21               | gain                | 15              | 122                                     | 13                             | 10.7               | 10.7    | 0.7                                          |
| 2p22               | gain                | 14              | 126                                     | 9                              | 7.1                | 11.0    | -0.6                                         |
| 2p23               | gain                | 12              | 182                                     | 9                              | 4.9                | 16.0    | -1.7                                         |
| 2p24               | gain                | 13              | 75                                      | 3                              | 4                  | 6.6     | -1.4                                         |
| 2p25               | gain                | 13              | 114                                     | 6                              | 5.3                | 10.0    | -1.3                                         |
| 2q11               | gain                | 11              | 175                                     | 12                             | 6.9                | 15.3    | -0.9                                         |
| 2q12               | gain                | 11              | 44                                      | 4                              | 9.1                | 3.9     | 0.1                                          |
| 2q13               | gain                | 11              | 108                                     | 4                              | 3.7                | 9.5     | -1.8                                         |
| 2q14               | gain                | 11              | 135                                     | 15                             | 11.1               | 11.8    | 0.9                                          |
| 2q21               | gain                | 11              | 91                                      | 8                              | 8.8                | 8.0     | 0.0                                          |
| 2q22               | gain                | 12              | 43                                      | 2                              | 4.7                | 3.8     | -0.9                                         |
| 2q23               | gain                | 12              | 67                                      | 11                             | 16.4               | 5.9     | 2.1                                          |
| 2q24               | gain                | 12              | 141                                     | 4                              | 2.8                | 12.4    | -2.4                                         |
| 2q31               | gain                | 12              | 221                                     | 25                             | 11.3               | 19.4    | 1.3                                          |
| 2q32               | gain                | 12              | 122                                     | 15                             | 12.3               | 10.7    | 1.3                                          |
| 2q33               | gain                | 12              | 225                                     | 27                             | 12                 | 19.7    | 1.6                                          |

|      |      |    |       |      |      |        |      |   |
|------|------|----|-------|------|------|--------|------|---|
| 2q34 | gain | 11 | 40    | 2    | 5    | 3.5    | -0.8 |   |
| 2q35 | gain | 11 | 141   | 5    | 3.5  | 12.4   | -2.1 |   |
| 2q36 | gain | 11 | 103   | 4    | 3.9  | 9.0    | -1.7 |   |
| 2q37 | gain | 11 | 240   | 13   | 5.4  | 21.0   | -1.8 |   |
| 4q31 | loss | 5  | 196   | 2    | 1    | 17.2   | -3.7 |   |
| 4q32 | loss | 5  | 99    | 1    | 1    | 8.7    | -2.6 |   |
| 4q33 | loss | 8  | 18    | 1    | 5.6  | 1.6    | -0.5 |   |
| 4q34 | loss | 8  | 53    | 2    | 3.8  | 4.6    | -1.2 |   |
| 4q35 | loss | 8  | 91    | 4    | 4.4  | 8.0    | -1.4 |   |
| 5p12 | gain | 7  | 47    | 4    | 8.5  | 4.1    | -0.1 |   |
| 5p13 | gain | 7  | 168   | 6    | 3.6  | 14.7   | -2.3 |   |
| 5p14 | gain | 7  | 15    | 0    | 0    | 1.3    | -1.1 |   |
| 5p15 | gain | 7  | 165   | 8    | 4.8  | 14.5   | -1.7 |   |
| 5q11 | gain | 5  | 81    | 1    | 1.2  | 7.1    | -2.3 |   |
| 5q12 | gain | 5  | 90    | 3    | 3.3  | 7.9    | -1.7 |   |
| 5q13 | gain | 5  | 149   | 0    | 0    | 13.1   | -3.6 |   |
| 5q14 | gain | 5  | 152   | 2    | 1.3  | 13.3   | -3.1 |   |
| 5q15 | gain | 5  | 63    | 0    | 0    | 5.5    | -2.4 |   |
| 5q21 | loss | 5  | 82    | 3    | 3.7  | 7.2    | -1.6 |   |
| 5q22 | loss | 5  | 61    | 7    | 11.5 | 5.3    | 0.7  |   |
| 5q23 | loss | 5  | 149   | 7    | 4.7  | 13.1   | -1.7 |   |
| 5q31 | gain | 5  | 325   | 3    | 0.9  | 28.5   | -4.8 |   |
| 5q32 | gain | 6  | 83    | 1    | 1.2  | 7.3    | -2.3 |   |
| 5q33 | gain | 6  | 149   | 0    | 0    | 13.1   | -3.6 |   |
| 5q34 | gain | 6  | 40    | 1    | 2.5  | 3.5    | -1.3 |   |
| 5q35 | gain | 6  | 283   | 8    | 2.8  | 24.8   | -3.4 |   |
| 6p11 | gain | 9  | 3     | 0    | 0    | 0.3    | -0.5 |   |
| 6p12 | gain | 9  | 128   | 5    | 3.9  | 11.2   | -1.9 |   |
| 6p21 | gain | 12 | 647   | 59   | 9.1  | 56.7   | 0.3  |   |
| 6p22 | gain | 11 | 313   | 16   | 5.1  | 27.4   | -2.2 |   |
| 6p23 | gain | 11 | 26    | 4    | 15.4 | 2.3    | 1.1  |   |
| 6p24 | gain | 11 | 79    | 11   | 13.9 | 6.9    | 1.5  |   |
| 6p25 | gain | 11 | 88    | 12   | 13.6 | 7.7    | 1.5  |   |
| 6q11 | loss | 17 | 1     | 0    | 0    | 0.1    | -0.3 |   |
| 6q12 | loss | 17 | 17    | 2    | 11.8 | 1.5    | 0.4  | * |
| 6q13 | loss | 18 | 56    | 6    | 10.7 | 4.9    | 0.5  | * |
| 6q14 | loss | 22 | 89    | 19   | 21.3 | 7.8    | 4.0  | * |
| 6q15 | loss | 25 | 79    | 19   | 24.1 | 6.9    | 4.6  | * |
| 6q16 | loss | 26 | 48    | 13   | 27.1 | 4.2    | 4.3  | * |
| 6q21 | loss | 28 | 147   | 42   | 28.6 | 12.9   | 8.1  | * |
| 6q22 | loss | 28 | 124   | 23   | 18.5 | 10.9   | 3.7  | * |
| 6q23 | loss | 29 | 130   | 19   | 14.6 | 11.4   | 2.3  | * |
| 6q24 | loss | 27 | 87    | 22   | 25.3 | 7.6    | 5.2  | * |
| 6q25 | loss | 24 | 174   | 33   | 19   | 15.3   | 4.5  | * |
| 6q26 | loss | 23 | 27    | 3    | 11.1 | 2.4    | 0.4  |   |
| 6q27 | loss | 23 | 94    | 19   | 20.2 | 8.2    | 3.7  | * |
| 7p11 | gain | 23 | 39    | 7    | 17.9 | 3.4    | 1.9  |   |
| 7p12 | gain | 23 | 33    | 1    | 3    | 2.9    | -1.1 |   |
| 7p13 | gain | 23 | 110   | 21   | 19.1 | 9.6    | 3.7  | * |
| 7p14 | gain | 23 | 141   | 26   | 18.4 | 12.4   | 3.9  | * |
| 7p15 | gain | 23 | 165   | 19   | 11.5 | 14.5   | 1.2  |   |
| 7p21 | gain | 24 | 95    | 11   | 11.6 | 8.3    | 0.9  |   |
| 7p22 | gain | 24 | 168   | 33   | 19.6 | 14.7   | 4.8  | * |
| 7q11 | gain | 26 | 206   | 64   | 31.1 | 18.1   | 10.8 | * |
| 7q21 | gain | 25 | 206   | 28   | 13.6 | 18.1   | 2.3  | * |
| 7q22 | gain | 25 | 290   | 60   | 20.7 | 25.4   | 6.9  | * |
| 7q31 | gain | 23 | 151   | 14   | 9.3  | 13.2   | 0.2  |   |
| 7q32 | gain | 22 | 133   | 22   | 16.5 | 11.7   | 3.0  | * |
| 7q33 | gain | 23 | 65    | 12   | 18.5 | 5.7    | 2.6  | * |
| 7q34 | gain | 23 | 142   | 17   | 12   | 12.4   | 1.3  |   |
| 7q35 | gain | 23 | 29    | 0    | 0    | 2.5    | -1.6 |   |
| 7q36 | gain | 23 | 201   | 32   | 15.9 | 17.6   | 3.4  | * |
| 8p11 | gain | 11 | 83    | 3    | 3.6  | 7.3    | -1.6 |   |
| 8p12 | gain | 11 | 105   | 8    | 7.6  | 9.2    | -0.4 |   |
| 8p21 | gain | 11 | 205   | 16   | 7.8  | 18.0   | -0.5 |   |
| 8p22 | gain | 11 | 59    | 3    | 5.1  | 5.2    | -1.0 |   |
| 8p23 | gain | 11 | 282   | 13   | 4.6  | 24.7   | -2.4 |   |
| 8q11 | gain | 11 | 61    | 8    | 13.1 | 5.3    | 1.1  |   |
| 8q12 | gain | 11 | 86    | 9    | 10.5 | 7.5    | 0.5  |   |
| 8q13 | gain | 11 | 92    | 9    | 9.8  | 8.1    | 0.3  |   |
| 8q21 | gain | 13 | 156   | 14   | 9    | 13.7   | 0.1  |   |
| 8q22 | gain | 15 | 159   | 29   | 18.2 | 13.9   | 4.0  | * |
| 8q23 | gain | 18 | 49    | 6    | 12.2 | 4.3    | 0.8  |   |
| 8q24 | gain | 21 | 391   | 69   | 17.6 | 34.3   | 5.9  | * |
| 9p23 | loss | 6  | 17    | 0    | 0    | 1.5    | -1.2 |   |
| 9p24 | loss | 6  | 102   | 0    | 0    | 8.9    | -3.0 |   |
| 9q12 | gain | 5  | 3     | 0    | 0    | 0.3    | -0.5 |   |
| 9q13 | gain | 5  | 13    | 0    | 0    | 1.1    | -1.1 |   |
| 9q21 | gain | 5  | 172   | 1    | 0.6  | 15.1   | -3.6 |   |
| 9q22 | gain | 5  | 178   | 1    | 0.6  | 15.6   | -3.7 |   |
| 9q31 | gain | 5  | 147   | 3    | 2    | 12.9   | -2.8 |   |
| 9q32 | gain | 5  | 50    | 0    | 0    | 4.4    | -2.1 |   |
| 9q33 | gain | 5  | 238   | 2    | 0.8  | 20.9   | -4.1 |   |
| 9q34 | gain | 7  | 439   | 4    | 0.9  | 38.5   | -5.6 |   |
| Xp11 | gain | 18 | 298   | 53   | 17.8 | 26.1   | 5.3  | * |
| Xp21 | gain | 17 | 39    | 0    | 0    | 3.4    | -1.8 |   |
| Xp22 | gain | 16 | 235   | 23   | 9.8  | 20.6   | 0.5  |   |
| Xq11 | gain | 17 | 11    | 3    | 27.3 | 1.0    | 2.1  | * |
| Xq12 | gain | 17 | 22    | 3    | 13.6 | 1.9    | 0.8  |   |
| Xq13 | gain | 17 | 123   | 16   | 13   | 10.8   | 1.6  |   |
| Xq21 | gain | 17 | 85    | 7    | 8.2  | 7.5    | -0.2 |   |
| Xq22 | gain | 17 | 132   | 17   | 12.9 | 11.6   | 1.6  |   |
| Xq23 | gain | 17 | 49    | 3    | 6.1  | 4.3    | -0.6 |   |
| Xq24 | gain | 17 | 63    | 20   | 31.7 | 5.5    | 6.2  | * |
| Xq25 | gain | 17 | 63    | 11   | 17.5 | 5.5    | 2.3  | * |
| Xq26 | gain | 17 | 78    | 10   | 12.8 | 6.8    | 1.2  |   |
| Xq27 | gain | 17 | 31    | 1    | 3.2  | 2.7    | -1.0 |   |
| Xq28 | gain | 17 | 174   | 30   | 17.2 | 15.3   | 3.8  | * |
|      |      |    | 28118 | 2465 |      | 2465.0 | 0.0  |   |
